# Supplementary material for: Sirt6 regulates postnatal growth plate differentiation and proliferation via Ihh signaling
Source: PubMed Central journal article supplement (PMC6505680; doi:10.1038/srep03022), 2013-10-23
Supplement: srep03022-s1.pdf [file srep03022-s1.pdf]

# Title; Sirt6 regulates postnatal growth plate differentiation and proliferation via Ihh signaling.

Jinying Piao<sup>1</sup>, Kunikazu Tsuji<sup>2</sup>, Hiroki Ochi<sup>3</sup>, Munetaka Iwata<sup>4</sup>, Daisuke Koga<sup>5</sup>, Atsushi Okawa<sup>5</sup>, Sadao Morita<sup>1</sup>, Shu Takeda<sup>6</sup>, Yoshinori Asou<sup>5</sup>

1; Department of Rehabilitation Medicine, Graduate School, Tokyo Medical and Dental University

1-5-45 Yushima Bunkyo-ku Tokyo Japan, 113-8519

2; Department of Joint Surgery and Sports Medicine

Section of Cartilage Regeneration, Tokyo Medical and Dental University, Tokyo, Japan

1-5-45 Yushima Bunkyo-ku Tokyo Japan, 113-8519

3; Laboratory of Veterinary Microbiology, Nippon Veterinary and Life Science University,

1-7-1 Sakaiminamicho Musashino-shi Tokyo Japan, 180-8602

4; Division of Veterinary Surgery, School of Veterinary Medicine, Nippon Veterinary and Life Science University

1-7-1 Sakaiminamicho Musashino-shi Tokyo Japan, 180-8602

5; Department of Orthopedics Surgery, Tokyo Medical and Dental University

1-5-45 Yushima Bunkyo-ku Tokyo Japan, 113-8519

6; Department of Physiology and Cell Biology, Tokyo Medical and Dental University

1-5-45 Yushima Bunkyo-ku Tokyo Japan, 113-8519

WT

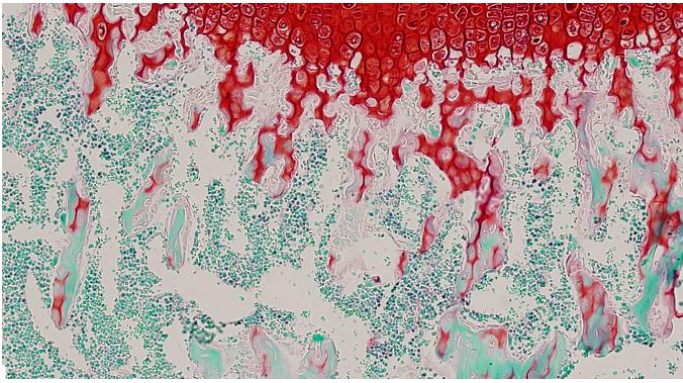

Sirt6<sup>-/-</sup>

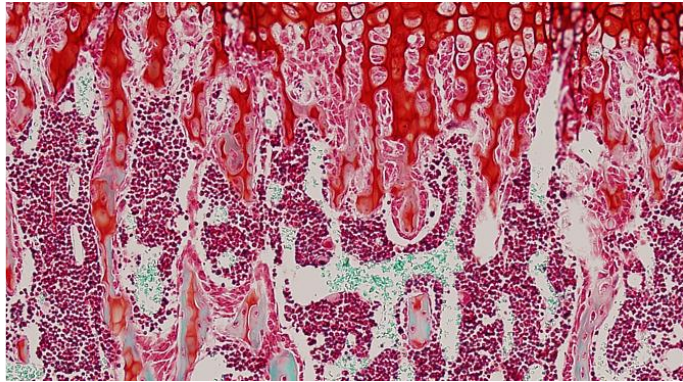

Supplementary Figure S1

Primary spongiosa from 3.5-week-old mice were stained with safranin O (X100).

Note the remarkable delay of ossification in Sirt6<sup>-/-</sup> mice.

a

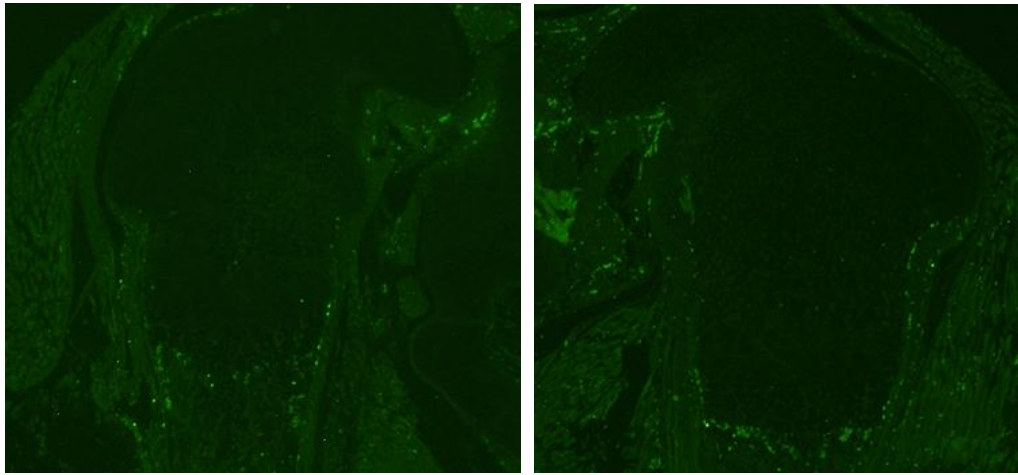

WT

Sirt6-/-

b

DAPI

Caspase-3

Merge

WT

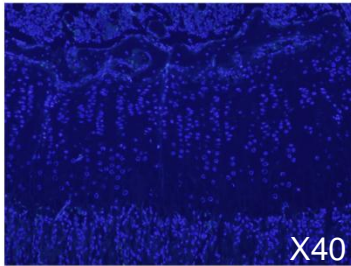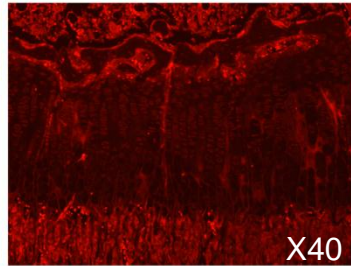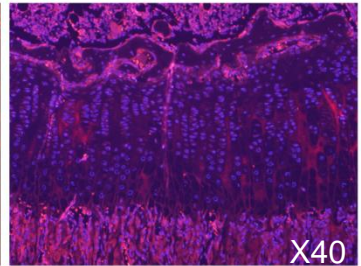

Sirt6 -/-

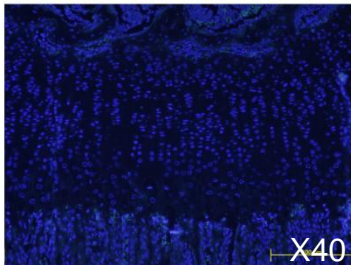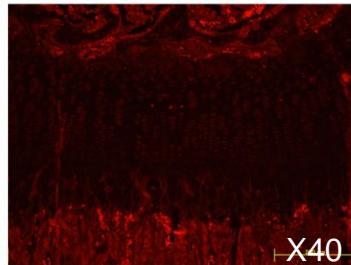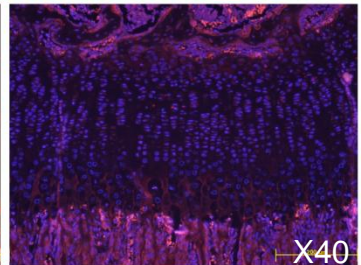

Supplementary Figure S2

(a) TUNEL staining of P1 WT and Sirt6<sup>-/-</sup> mouse femur sections.

The number of apoptotic cells was similar between Sirt6<sup>-/-</sup> and WT.

(b) Immunohistological findings for activated caspase-3 in P14.

Caspase-3 was not activated in the proliferating zone of both WT and Sirt6<sup>-/-</sup> mice.

# Primary chondrocyte

a

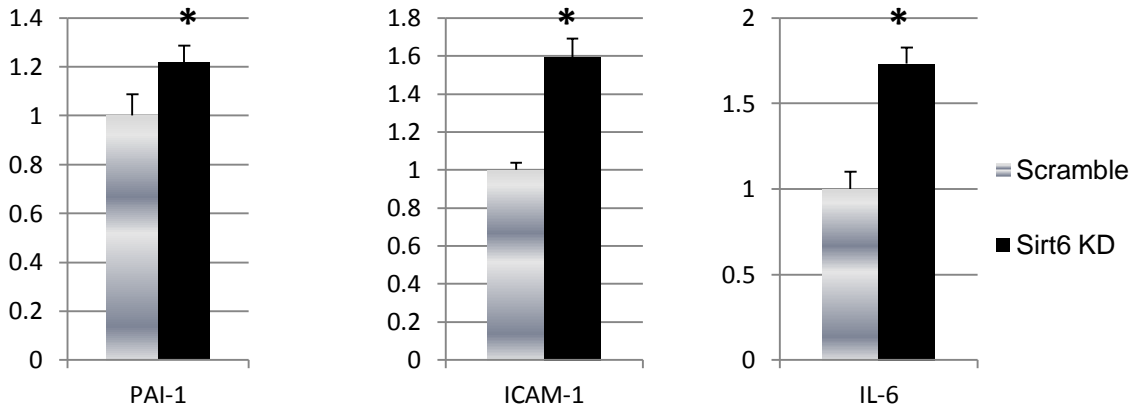

# ATDC5 cells

b

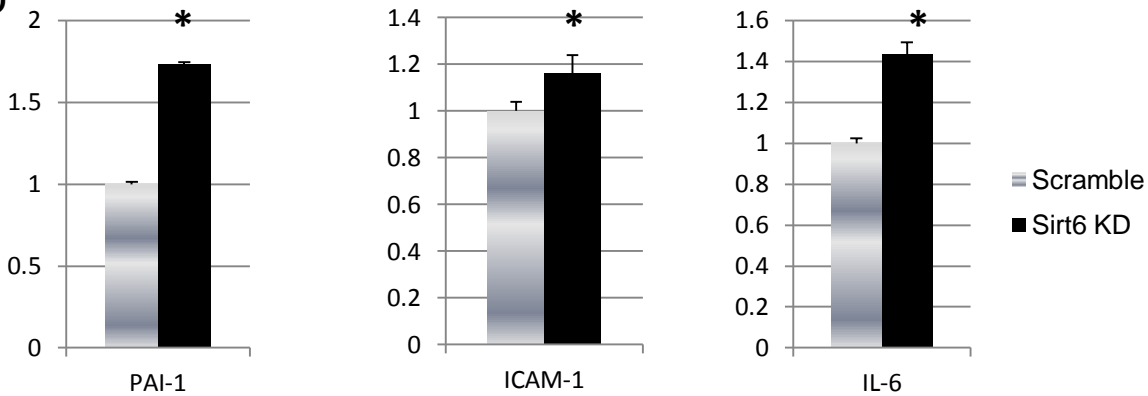

## Supplementary Figure S3

mRNA expression of PAI-1, ICAM-1 and IL-6 was enhanced by Sirt6 knockdown in primary chondrocyte (a) and ATDC5 cells (b).

The graph shows relative levels of gene expression.

Values represent the mean  $\pm$  SD of 3 samples per group. \*; p < 0.05.

scrambled siRNA

Sirt6 siRNA

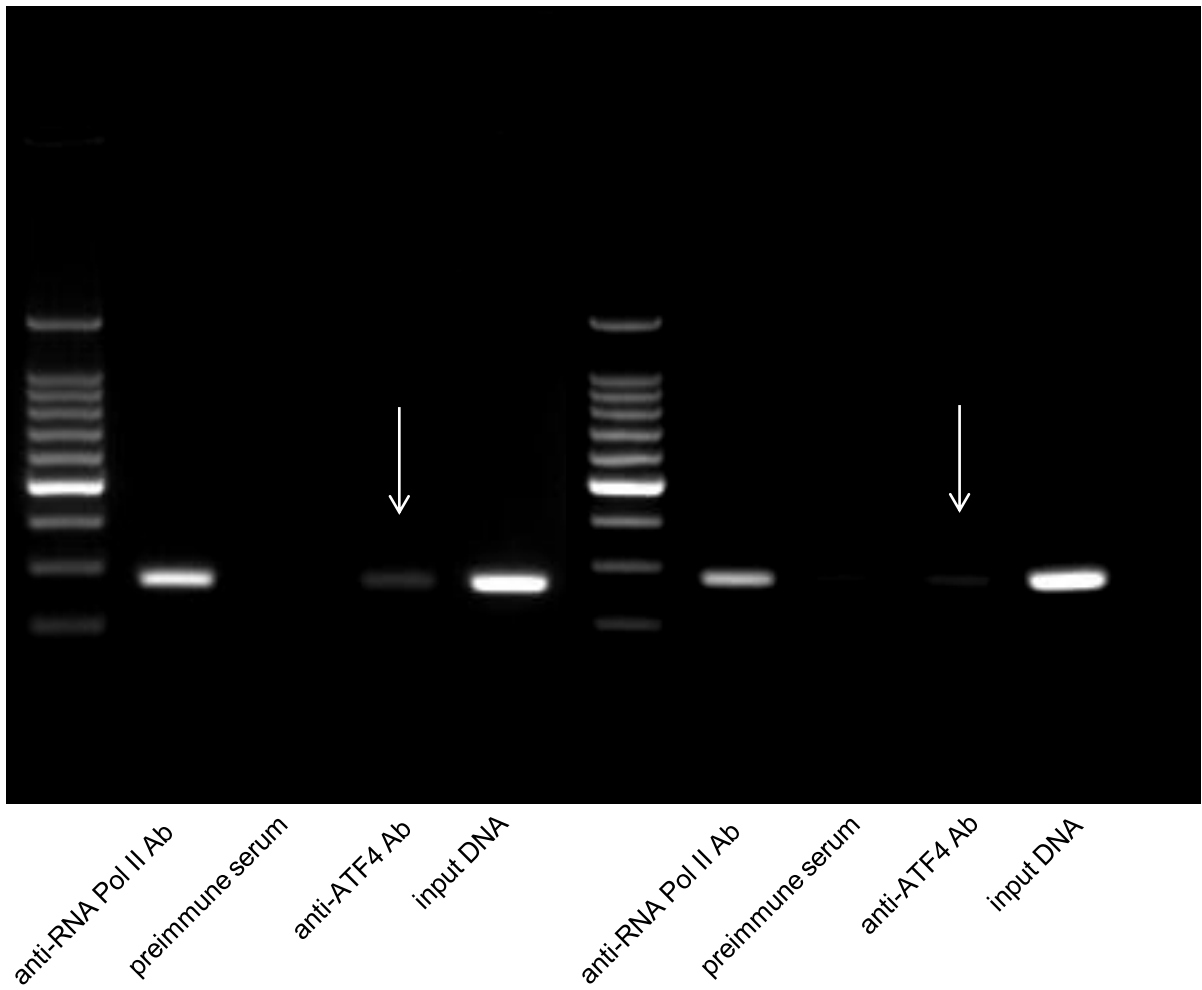

Supplementary Figure S4

Representative CHIP of *Ihh* with anti-ATF-4 antibody (Ab) and qRT-PCR of CHIP-ed in primary chondrocytes treated with scrambled siRNA (left panel) and Sirt6 siRNA (right panel).
